# Supplementary material for: Metabolomic and Proteomic Analysis of Maize Embryonic Callus induced from immature embryo
Source: PubMed Central journal article supplement (PMC5430770; doi:10.1038/s41598-017-01280-8), 2017-04-21
Supplement: 41598_2017_1280_MOESM1_ESM.pdf [file 41598_2017_1280_MOESM1_ESM.pdf]

# Metabolomic and Proteomic Analysis of Maize Embryonic Callus induced from immature embryo

Fei Ge<sup>1+</sup>, Hongmei Hu<sup>1+</sup>, Xing Huang<sup>1</sup>, Yanling Zhang<sup>1</sup>, Yanli Wang<sup>1</sup>, Zhaoling Li<sup>1</sup>, Chaoying Zou<sup>1</sup>, Huanwei Peng<sup>2</sup>, Lujiang Li<sup>1</sup>, Shibin Gao<sup>1</sup>, Guangtang Pan<sup>1</sup>, Yaou Shen<sup>1\*</sup>

<sup>1</sup> Key Laboratory of Biology and Genetic Improvement of Maize in Southwest Region, Maize Research Institute, Sichuan Agricultural University, Chengdu 611130, China;

<sup>2</sup> Institute of Animal Nutrition, Sichuan Agricultural University, Chengdu 611130, China.

<sup>+</sup> These authors contributed equally to this work.

\* Correspondence author: Yaou Shen, shenyaou@aliyun.com.

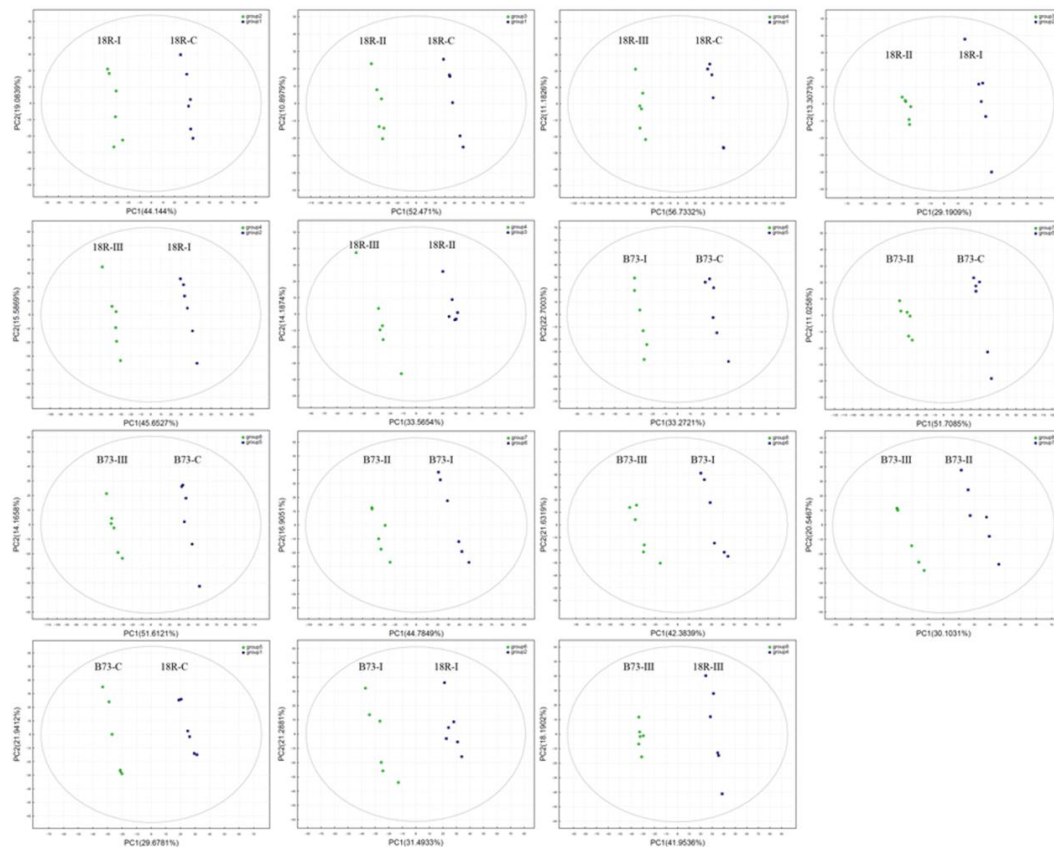

**Supplementary Fig. S1.** Partial least-squares discriminant analysis (PLS-DA) result of different stages in 18R and B73.

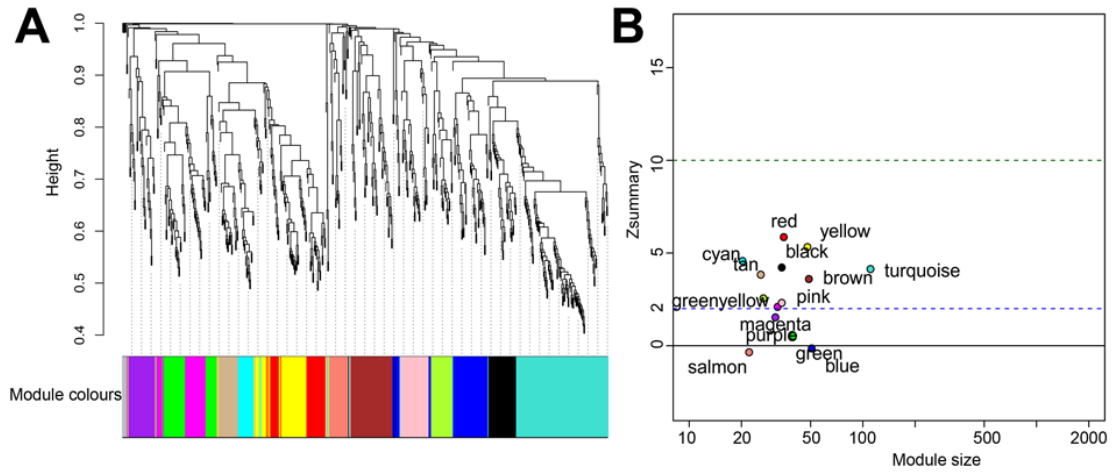

**Supplementary Fig. S2.** The modules of 18R (A) and module preservation results (B).

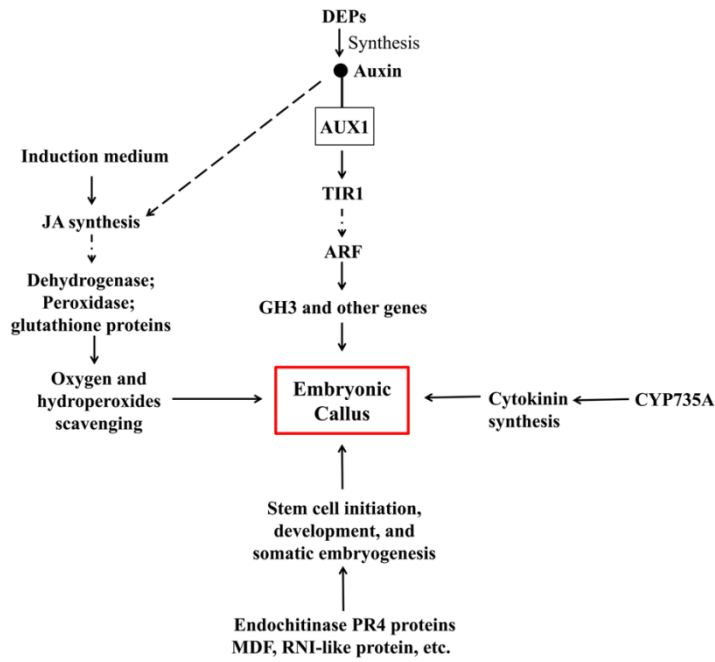

**Supplementary Fig. S3.** The hypothesized mechanism of EC induction.
